## RETRACTION

## Retraction: Applications of bioconvection for tiny particles due to two concentric cylinders when role of Lorentz force is significant

The *PLOS One* Editors

### Introduction:

The *PLOS One* Editors retract this article [1] due to concerns about potential manipulation of the publication process. These concerns call into question the validity and provenance of the reported results. We regret that the issues were not identified prior to the article's publication.

VP, MlJK, and NAS did not agree with the retraction. LZ, EREZ, NM, JDC, SUK, and MImK either did not respond directly or could not be reached.

### Reference

1. Zhang L, Puneeth V, Ijaz Khan M, El-Zahar ER, Manjunath N, Shah NA, et al. Applications of bioconvection for tiny particles due to two concentric cylinders when role of Lorentz force is significant. *PLoS One*. 2022;17(5): e0265026. <https://doi.org/10.1371/journal.pone.0265026> PMID: [35503769](https://pubmed.ncbi.nlm.nih.gov/35503769/)

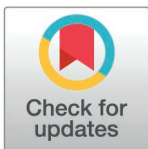

### OPEN ACCESS

**Citation:** The *PLOS One* Editors (2025) Retraction: Applications of bioconvection for tiny particles due to two concentric cylinders when role of Lorentz force is significant. *PLoS ONE* 20(5): e0323142. <https://doi.org/10.1371/journal.pone.0323142>

**Published:** May 7, 2025

**Copyright:** © 2025 The *PLOS One* Editors. This is an open access article distributed under the terms of the [Creative Commons Attribution License](https://creativecommons.org/licenses/by/4.0/), which permits unrestricted use, distribution, and reproduction in any medium, provided the original author and source are credited.
